# Supplementary material for: With or without light: comparing the reaction mechanism of dark-operative protochlorophyllide oxidoreductase with the energetic requirements of the light-dependent protochlorophyllide oxidoreductase
Source: PeerJ. 2014 Sep 2;2:e551. doi: 10.7717/peerj.551 (PMC4157233; doi:10.7717/peerj.551)
Supplement: Supplemental Information 2 [file peerj-02-551-s002.xlsx]

## Sheet: Folha2
Fe-S cluster	Added electrons	H+ in	H+ in	eps=10	eps=4	eps=10	eps=20	eps=80				reduced cluster	oxidized cluster	Fe-S redox potential	substrate potential (w/ reduced cluster)	substrate potential (w/ oxidized cluster)
reduced	0	Asp274	propionate	-6.80368e+06	-6.80363e+06	-6.80368e+06	-6.8037e+06	-6.80372e+06				0	0	2.70159	2.77748	2.80567
reduced	0	C17	propionate	-6.80366e+06	-6.80361e+06	-6.80366e+06	-6.80368e+06	-6.80369e+06				25.36	25.25	2.69682	3.95005	3.9674
reduced	0	Asp274	C18	-6.80366e+06	-6.80361e+06	-6.80366e+06	-6.80368e+06	-6.8037e+06				20.34	19.98	2.68598	3.90192	3.90929
reduced	1	Asp274	propionate	-6.80375e+06	-6.80368e+06	-6.80375e+06	-6.80377e+06	-6.80379e+06				-64.05	-64.7	2.67341	n.d	n.d
reduced	1	C17	propionate	-6.80375e+06	-6.80368e+06	-6.80375e+06	-6.80377e+06	-6.80379e+06				-65.73	-66.24	2.67948	2.83472	2.85337
reduced	1	Asp274	C18	-6.80375e+06	-6.80369e+06	-6.80375e+06	-6.80378e+06	-6.80379e+06				-69.64	-70.17	2.67861	2.46916	2.48911
reduced	1	C17	C18	-6.80376e+06	n.d.	-6.80376e+06	-6.80378e+06	-6.8038e+06				-72.2	-72.14	2.70419	4.22368	4.24796
reduced	2	C17	propionate	-6.80382e+06	-6.80373e+06	-6.80382e+06	-6.80385e+06	-6.80387e+06				-131.1	-132.04	2.66083	n.a.	n.a.
reduced	2	Asp274	C18	-6.80381e+06	-6.80372e+06	-6.80381e+06	-6.80384e+06	-6.80387e+06				-126.58	-127.57	2.65866	n.a.	n.a.
reduced	2	C17	C18	-6.80385e+06	-6.80377e+06	-6.80385e+06	-6.80388e+06	-6.80391e+06				-169.6	-170.1	2.67991	n.a.	n.a.
oxidized	0	Asp274	propionate	-6.80362e+06	-6.80359e+06	-6.80362e+06	-6.80363e+06	-6.80364e+06
oxidized	0	C17	propionate	-6.8036e+06	-6.80357e+06	-6.8036e+06	-6.80361e+06	-6.80362e+06
oxidized	0	Asp274	C18	-6.8036e+06	-6.80357e+06	-6.8036e+06	-6.80361e+06	-6.80362e+06
oxidized	1	Asp274	propionate	-6.80369e+06	-6.80365e+06	-6.80369e+06	-6.8037e+06	-6.80371e+06
oxidized	1	C17	propionate	-6.80369e+06	-6.80365e+06	-6.80369e+06	-6.8037e+06	-6.80371e+06
oxidized	1	Asp274	C18	-6.80369e+06	-6.80365e+06	-6.80369e+06	-6.80371e+06	-6.80372e+06
oxidized	1	C17	C18	-6.80369e+06	-6.80365e+06	-6.80369e+06	-6.80371e+06	-6.80372e+06
oxidized	2	C17	propionate	-6.80375e+06	-6.8037e+06	-6.80375e+06	-6.80377e+06	-6.80379e+06
oxidized	2	Asp274	C18	-6.80375e+06	-6.80369e+06	-6.80375e+06	-6.80377e+06	-6.80379e+06				H+ in	H+ in	reduced cluster, "pristine" substrate	oxidized cluster, one-electron reduced substrate
oxidized	2	C17	C18	-6.80379e+06	-6.80373e+06	-6.80379e+06	-6.80381e+06	-6.80383e+06				Asp274	propionate	0	-2.4
												Asp274 …. C17	propionate	31.439	11.219
												C17	propionate	25.36	-3.94
												C17	propionate….C18		6.853
												C17	C18		-9.84
				eps=10	eps=4	eps=10	eps=20	eps=80
	0	Asp274	Propionate … C18	24.676	23.966	24.676	24.956	25.196				H+ in	H+ in	reduced cluster, one-electron reduced substrate	oxidized cluster, two-electron reduced substrate
	0	Asp274 … C17	propionate	31.439	31.309	31.439	31.499	31.559				Asp274	propionate	0
	1	Asp274	Propionate … C18	9.167	8.897	9.167	9.287	9.387				Asp274 …. C17	propionate	13.619
	1	Asp274… C17	C18	18.855	18.255	18.855	19.125	19.355				C17	propionate	-1.68	-5.69
	1	Asp274… C17	propionate	13.619	13.069	13.619	13.799	13.939				C17	propionate….C18	9.113	-8.769
	1	C17	Propionate … C18	10.793	10.353	10.793	11.003	11.183				C17	C18	-8.15	-43.75
	2	Asp274… C17	C18	-5	-5.78	-5	-4.7	-4.45
	2	C17	Propionate … C18	-3.079	-3.299	-3.079	-2.949	-2.829
												H+ in	H+ in	reduced cluster, "pristine" substrate	oxidized cluster, one-electron reduced substrate
												Asp274	propionate	0	-2.4
												Asp274	propionate … C18	24.676	6.767
												Asp274	C18	20.34	-7.87
												Asp274 …. C17	C18		10.985
												C17	C18		-9.84
												H+ in	H+ in	reduced cluster, one-electron reduced substrate	oxidized cluster, two-electron reduced substrate
												Asp274	propionate	0
												Asp274	propionate … C18	9.167
												Asp274	C18	-5.59	-1.22
												Asp274 …. C17	C18	13.265	-6.22
												C17	C18	-8.15	-43.75

## Sheet: Folha3
											1									1
				H+ in	H+ in	reduced cluster, "pristine" substrate	oxidized cluster, one-electron reduced substrate
				Asp274	propionate	0	-2.4				0	0	-2.4							0	0	-2.4
				Asp274 …. C17	propionate	31.439	11.219				1	0	-2.4							1	0	-2.4
				C17	propionate	25.36	-3.94				2	24.676	6.767							2	31.439	11.219
				C17	propionate….C18		6.853				3	24.676	6.767							3	31.439	11.219
				C17	C18		-9.84				4	20.34	-7.87							4	25.36	-3.94
											5	20.34	-7.87							5	25.36	-3.94
				H+ in	H+ in	reduced cluster, one-electron reduced substrate	oxidized cluster, two-electron reduced substrate				6		10.985							6		6.853
				Asp274	propionate	0					7		10.985							7		6.853
				Asp274 …. C17	propionate	13.619					8		-9.84							8		-9.84
				C17	propionate	-1.68	-5.69				9		-9.84							9		-9.84
				C17	propionate….C18	9.113	-8.769
				C17	C18	-8.15	-43.75
											0	0								0	0
											1	0								1	0
											2	9.167								2	13.619
											3	9.167								3	13.619
				H+ in	H+ in	reduced cluster, "pristine" substrate	oxidized cluster, one-electron reduced substrate				4	-5.59	-1.22							4	-1.68	-5.69
				Asp274	propionate	0	-2.4				5	-5.59	-1.22							5	-1.68	-5.69
				Asp274	propionate … C18	24.676	6.767				6	13.265	-6.22							6	9.113	-8.769
				Asp274	C18	20.34	-7.87				7	13.265	-6.22							7	9.113	-8.769
				Asp274 …. C17	C18		10.985				8	-8.15	-43.75							8	-8.15	-43.75
				C17	C18		-9.84				9	-8.15	-43.75							9	-8.15	-43.75
				H+ in	H+ in	reduced cluster, one-electron reduced substrate	oxidized cluster, two-electron reduced substrate
				Asp274	propionate	0
				Asp274	propionate … C18	9.167
				Asp274	C18	-5.59	-1.22
				Asp274 …. C17	C18	13.265	-6.22
				C17	C18	-8.15	-43.75
