# Supplementary material for: With or without light: comparing the reaction mechanism of dark-operative protochlorophyllide oxidoreductase with the energetic requirements of the light-dependent protochlorophyllide oxidoreductase
Source: PeerJ. 2014 Sep 2;2:e551. doi: 10.7717/peerj.551 (PMC4157233; doi:10.7717/peerj.551)
Supplement: Supplemental Information 4 [file peerj-02-551-s004.xlsx]

## Sheet: energies(1)
	minimal	minimal	minimal	minimal		aa	aa	aa	aa		minimal	minimal	minimal	minimal		aa	aa	aa	aa
0	4	10	20	80	0	4	10	20	80		4	10	20	80		4	10	20	80
start	-589350	-589354	-589356	-589357	start	-981798	-981810	-981815	-981819
C17H	-589305	-589310	-589311	-589313	C17H	-981755	-981768	-981772	-981776		45.37	44.49	44.15	43.89		42.85	42.79	42.71	42.61
C18H	N/A	N/A	N/A	N/A	C18H	-981755	-981771	-981777	-981781
bothH	N/A	N/A	N/A	N/A	bothH	N/A	N/A	N/A	N/A
1					1
start	-589386	-589395	-589398	-589401	start	N/A	N/A	N/A	N/A
C17H	-589405	-589415	-589419	-589421	C17H	-981870	-981880	-981884	-981887
C18H	-589402	-589414	-589418	-589422	C18H	-981866	-981879	-981884	-981888		2.97	0.99	0.29	-0.25		4.59	0.82	-0.36	-1.21
bothH	-589405	-589416	-589421	-589424	bothH	-981866	-981879	-981884	-981887		0.42	-1.21	-1.86	-2.4		4.3	1.35	0.34	-0.43
