# Supplementary material for: With or without light: comparing the reaction mechanism of dark-operative protochlorophyllide oxidoreductase with the energetic requirements of the light-dependent protochlorophyllide oxidoreductase
Source: PeerJ. 2014 Sep 2;2:e551. doi: 10.7717/peerj.551 (PMC4157233; doi:10.7717/peerj.551)
Supplement: Supplemental Information 5 [file peerj-02-551-s005.xlsx]

## Sheet: nrgs
	0e	0e	0e	0e	1e	1e	1e	1e	2e	2e	2e	2e
	4	10	20	80	4	10	20	80	4	10	20	80
start	-1.56492e+06	-1.56492e+06	-1.56493e+06	-1.56493e+06	-1.56498e+06	-1.56499e+06	-1.56499e+06	-1.565e+06
start C17H	-1.56489e+06	-1.5649e+06	-1.5649e+06	-1.5649e+06	-1.56498e+06	-1564988	-1.56499e+06	-1.565e+06
start C18H	-1.5649e+06	-1.5649e+06	-1.56491e+06	-1.56491e+06	-1.56498e+06	-1.56499e+06	-1.565e+06	-1.565e+06
1e	-1.56491e+06	-1.56492e+06	-1.56492e+06	-1.56492e+06	-1.56498e+06	-1.56499e+06	-1.56499e+06	-1.565e+06
1e C17H	-1.56489e+06	-1.5649e+06	-1.5649e+06	-1.5649e+06	-1.56498e+06	-1.56499e+06	-1.565e+06	-1.565e+06	-1.56504e+06	-1.56506e+06	-1.56507e+06	-1.56508e+06
1e C18H	-1.5649e+06	-1.5649e+06	-1.56491e+06	-1.56491e+06	-1.56498e+06	-1.565e+06	-1.565e+06	-1.565e+06	-1.56503e+06	-1.56506e+06	-1.56507e+06	-1.56507e+06
1e produto					-1.56498e+06	-1.565e+06	-1.565e+06	-1.56501e+06	-1.56507e+06	-1.5651e+06	-1.56511e+06	-1.56511e+06
2e									-1.56502e+06	-1.56504e+06	-1.56505e+06	-1.56506e+06
2e C17H					-1.56498e+06	-1.56499e+06	-1.56499e+06	-1.565e+06	-1.56504e+06	-1.56506e+06	-1.56507e+06	-1.56508e+06
2e C18H					-1.56498e+06	-1.56499e+06	-1.565e+06	-1.565e+06	-1.56503e+06	-1.56506e+06	-1.56507e+06	-1.56508e+06
2e prod					-1.56498e+06	-1.565e+06	-1.565e+06	-1.565e+06	-1.56508e+06	-1.5651e+06	-1.56511e+06	-1.56512e+06
	4	10	20	80	4	10	20	80
Fe ox1	-5.23865e+06	-5.23868e+06	-5.23868e+06	-5.23869e+06	-5.23869e+06	-5.23874e+06	-5.23876e+06	-5.23877e+06
Fe red1	-5.23864e+06	-5.23866e+06	-5.23867e+06	-5.23868e+06	-5.23869e+06	-5.23874e+06	-5.23876e+06	-5.23877e+06
											Correct geom	Correct geom	Correct geom	Correct geom		not-reorganized	not-reorganized	not-reorganized	not-reorganized
		4	10	20	80	4	10	20	80		4	10	20	80		4	10	20	80
	Fe-red+ start	-6803610	-6.80366e+06	-6.80368e+06	-6.8037e+06	-6.8036e+06	-6.80366e+06	-6.80368e+06	-6.80369e+06	0	0	0	0	0	1	5.3	3.78	3.2	2.75
	Fe-red+ start C17H	-6.80358e+06	-6.80364e+06	-6.80366e+06	-6.80367e+06	-6.80358e+06	-6.80364e+06	-6.80366e+06	-6.80367e+06	0	0	0	0	0	1	2.27	-0.64	-1.79	-2.74
	Fe-red+ start C18H	-6.80359e+06	-6.80364e+06	-6.80366e+06	-6.80368e+06	-6.80359e+06	-6.80365e+06	-6.80367e+06	-6.80368e+06	0	0	0	0	0	1	0.66	-1.55	-2.43	-3.16
	Fe-ox+ 1e	-6.80363e+06	-6.80367e+06	-6.80368e+06	-6.80369e+06	-6.80362e+06	-6.80365e+06	-6.80367e+06	-6.80367e+06	1	-22.06	-3	3.41	8.21	0	-8.77	10.63	17.15	22.06
	Fe-ox+ 1e C17H	-6.80363e+06	-6.80367e+06	-6.80368e+06	-6.80369e+06	-6.80362e+06	-6.80365e+06	-6.80366e+06	-6.80367e+06	1	-48.79	-29.48	-22.99	-18.14	0	-32.93	-12.24	-5.22	0.09
	Fe-ox+ 1e C18H	-6.80364e+06	-6.80367e+06	-6.80368e+06	-6.80369e+06	-6.80362e+06	-6.80365e+06	-6.80367e+06	-6.80368e+06	1	-46.69	-27.96	-21.69	-17.01	0	-29.69	-9.99	-3.34	1.67
											4	10	20	80		4	10	20	80
	Fe-red+ 1e C17H	-6.80367e+06	-6.80373e+06	-6.80375e+06	-6.80377e+06	-6.80367e+06	-6.80373e+06	-6.80375e+06	-6.80377e+06	0	0	0	0	0	1	2.06	0.15	-0.55	-1.1
	Fe-red+ 1e C18H	-6.80368e+06	-6.80374e+06	-6.80376e+06	-6.80377e+06	-6.80368e+06	-6.80374e+06	-6.80376e+06	-6.80377e+06	0	0	0	0	0	1	1.53	-0.21	-0.87	-1.42
	Fe-red+ 1e product	-6.80368e+06	-6.80374e+06	-6803759	-6.80378e+06	-6.80368e+06	-6.80374e+06	-6.80376e+06	-6.80378e+06	0	0	0	0	0	1	1.95	-0.03	-0.77	-1.37
	Fe-ox + 2e C17H	-6.80369e+06	-6.80374e+06	-6.80376e+06	-6.80377e+06	-6.80368e+06	-6.80372e+06	-6.80374e+06	-6.80375e+06	1	-18.24	-6.77	-2.9	-0.02	0	-2.39	9.65	13.69	16.71
	Fe-ox + 2e C18H	-6.80369e+06	-6.80374e+06	-6.80375e+06	-6.80377e+06	-6.80367e+06	-6.80372e+06	-6.80374e+06	-6.80375e+06	1	-9.47	0.76	4.15	6.64	0	5.43	16.35	20	22.73
	Fe-ox + 2e produto	-6.80373e+06	-6.80378e+06	-6.80379e+06	-6.80381e+06	-6.80371e+06	-6.80376e+06	-6.80378e+06	-6.80379e+06	1	-51.61	-39.11	-34.89	-31.72	0	-37.12	-24	-19.54	-16.17
											Correct geom	Correct geom	Correct geom	Correct geom
											eps=4	eps=10	eps=20	water		eps=4	eps=10	eps=20	water
								a	Fe-ox+ 1e	0	-8.77	10.63	17.15	22.06
								a	Fe-ox+ 1e	0.47	-18.3268	0.828667	7.26957	12.1005						<0.5	<1	?	?
								a	Fe-ox+ 1e	0.5	-18.7375	0.4075	6.845	11.6725
								a	Fe-ox+ 1e	1	-22.06	-3	3.41	8.21		13.29	13.63	13.74	13.85
								a	Fe-red+ start	0	0	0	0	0
								a	Fe-red+ start	0.47	1.17077	0.835002	0.70688	0.607475
								a	Fe-red+ start	0.5	1.325	0.945	0.8	0.6875
								a	Fe-red+ start	1	5.3	3.78	3.2	2.75		-5.3	-3.78	-3.2	-2.75
								b	Fe-ox+ 1e C17H	0	-32.93	-12.24	-5.22	0.09
								b	Fe-ox+ 1e C17H	-0.001	-32.8983	-12.2055	-5.18444	0.126478						1.5	0.5	0.6	<0.1
								b	Fe-ox+ 1e C17H	0.5	-44.825	-25.17	-18.5475	-13.5825
								b	Fe-ox+ 1e C17H	1	-48.79	-29.48	-22.99	-18.14		15.86	17.24	17.77	18.23
								b	Fe-red+ start C17H	0	0	0	0	0
								b	Fe-red+ start C17H	-0.001	2.27e-06	0.00128064	0.00358179	0.00548274
								b	Fe-red+ start C17H	0.5	0.5675	-0.48	-1.3425	-2.055
								b	Fe-red+ start C17H	1	2.27	-0.64	-1.79	-2.74		-2.27	0.64	1.79	2.74
								c	Fe-ox+ 1e C18H	0	-29.69	-9.99	-3.34	1.67
								c	Fe-ox+ 1e C18H	0.06	-31.6688	-12.0817	-5.47594	-0.504352						<0.2	1	<1	<0.2
								c	Fe-ox+ 1e C18H	0.5	-42.44	-23.4675	-17.1025	-12.34
								c	Fe-ox+ 1e C18H	1	-46.69	-27.96	-21.69	-17.01		17	17.97	18.35	18.68
								c	Fe-red+ start C18H	0	0	0	0	0
								c	Fe-red+ start C18H	0.06	0.002376	-0.18042	-0.282852	-0.367824
								c	Fe-red+ start C18H	0.5	0.165	-1.1625	-1.8225	-2.37
								c	Fe-red+ start C18H	1	0.66	-1.55	-2.43	-3.16		-0.66	1.55	2.43	3.16
								d	Fe-ox + 2e C17H	0	-2.39	9.65	13.69	16.71
								d	Fe-ox + 2e C17H	0.1	-5.4015	6.5302	10.5379	13.5313						<0.1	<0.1	<0.1	?
								d	Fe-ox + 2e C17H	0.9	-18.0815	-6.6058	-2.7341	0.1473
								d	Fe-ox + 2e C17H	1	-18.24	-6.77	-2.9	-0.02		15.85	16.42	16.59	16.73
								d	Fe-red+ 1e C17H	0	0	0	0	0
								d	Fe-red+ 1e C17H	0.1	0.0206	0.0015	-0.1045	-0.209
								d	Fe-red+ 1e C17H	0.9	1.6686	0.1215	-0.5445	-1.089
								d	Fe-red+ 1e C17H	1	2.06	0.15	-0.55	-1.1		-2.06	-0.15	0.55	1.1
								e	Fe-ox + 2e C18H	0	5.43	16.35	20	22.73						<0.1	?	?	?
								e	Fe-ox + 2e C18H	0.2	0.066	10.7376	14.294	16.9376
								e	Fe-ox + 2e C18H	0.5	-5.745	4.6575	8.1125	10.6625
								e	Fe-ox + 2e C18H	1	-9.47	0.76	4.15	6.64		14.9	15.59	15.85	16.09
								e	Fe-red+ 1e C18H	0	0	0	0	0
								e	Fe-red+ 1e C18H	0.2	0.0612	-0.0756	-0.3132	-0.5112
								e	Fe-red+ 1e C18H	0.5	0.3825	-0.1575	-0.6525	-1.065
								e	Fe-red+ 1e C18H	1	1.53	-0.21	-0.87	-1.42		-1.53	0.21	0.87	1.42
								f	Fe-ox + 2e produto	0	-37.12	-24	-19.54	-16.17						<2	<0.1	<2	<2
								f	Fe-ox + 2e produto	-0.47	-20.2986	-6.4588	-1.72018	1.88199
								f	Fe-ox + 2e produto	0.5	-47.9875	-35.3325	-31.0525	-27.8325
								f	Fe-ox + 2e produto	1	-51.61	-39.11	-34.89	-31.72		14.49	15.11	15.35	15.55
								f	Fe-red+ 1e product	0	0	0	0	0
								f	Fe-red+ 1e product	-0.47	0.430755	0.034827	0.893893	1.59043
								f	Fe-red+ 1e product	0.5	0.4875	-0.0225	-0.5775	-1.0275
								f	Fe-red+ 1e product	1	1.95	-0.03	-0.77	-1.37		-1.95	0.03	0.77	1.37

## Sheet: Folha1
			eps=4		eps=10		eps=20		water
			Fe-ox + 2e C18H	Fe-red+ 1e C18H	Fe-ox + 2e C18H	Fe-red+ 1e C18H	Fe-ox + 2e C18H	Fe-red+ 1e C18H	Fe-ox + 2e C18H	Fe-red+ 1e C18H
		0	5.43	0	16.35	0	20	0	22.73	0
		0.2	0.066	0.0612	10.7376	-0.0756	14.294	-0.3132	16.9376	-0.5112
		0.5	-5.745	0.3825	4.6575	-0.1575	8.1125	-0.6525	10.6625	-1.065
		1	-9.47	1.53	0.76	-0.21	4.15	-0.87	6.64	-1.42
			eps=4		eps=10		eps=20		water
			Fe-ox+ 1e C17H	Fe-red+ start C17H	Fe-ox+ 1e C17H	Fe-red+ start C17H	Fe-ox+ 1e C17H	Fe-red+ start C17H	Fe-ox+ 1e C17H	Fe-red+ start C17H
		-0.1	-29.5994	0.0227	-8.6196		-1.4883		3.9183
		0	-32.93	0	-12.24	0	-5.22	0	0.09	0
		0.2	-38.6396	0.0908	-18.4464	-0.2304	-11.6172	-0.6444	-6.4728	-0.9864
		0.5	-44.825	0.5675	-25.17	-0.48	-18.5475	-1.3425	-13.5825	-2.055
		1	-48.79	2.27	-29.48	-0.64	-22.99	-1.79	-18.14	-2.74
			eps=4		eps=10		eps=20		water
			Fe-ox+ 1e C18H	Fe-red+ start C18H	Fe-ox+ 1e C18H	Fe-red+ start C18H	Fe-ox+ 1e C18H	Fe-red+ start C18H	Fe-ox+ 1e C18H	Fe-red+ start C18H
		-0.1	-26.12	0.0066	-6.2163		0.5135		5.5928
		0	-29.69	0	-9.99	0	-3.34	0	1.67	0
		0.2	-35.81	0.0264	-16.4592	-0.558	-9.946	-0.8748	-5.0548	-1.1376
		0.5	-42.44	0.165	-23.4675	-1.1625	-17.1025	-1.8225	-12.34	-2.37
		1	-46.69	0.66	-27.96	-1.55	-21.69	-2.43	-17.01	-3.16
			eps=4		eps=10		eps=20		water
			Fe-ox + 2e C17H	Fe-red+ 1e C17H	Fe-ox + 2e C17H	Fe-red+ 1e C17H	Fe-ox + 2e C17H	Fe-red+ 1e C17H	Fe-ox + 2e C17H	Fe-red+ 1e C17H
		-0.1	0.9385	0.0206	13.0982	0.0015	17.1739		20.2233
		0	-2.39	0	9.65	0	13.69	0	16.71	0
		0.2	-8.096	0.0824	3.7388	0.006	7.7176	-0.198	10.6872	-0.396
		0.5	-14.2775	0.515	-2.665	0.0375	1.2475	-0.4125	4.1625	-0.825
		1	-18.24	2.06	-6.77	0.15	-2.9	-0.55	-0.02	-1.1
			eps=4		eps=10		eps=20		water
			Fe-ox + 2e C18H	Fe-red+ 1e C18H	Fe-ox + 2e C18H	Fe-red+ 1e C18H	Fe-ox + 2e C18H	Fe-red+ 1e C18H	Fe-ox + 2e C18H	Fe-red+ 1e C18H
		-0.1	8.559	0.0153	19.6239		23.3285		26.1089
		0	5.43	0	16.35	0	20	0	22.73	0
		0.2	0.066	0.0612	10.7376	-0.0756	14.294	-0.3132	16.9376	-0.5112
		0.5	-5.745	0.3825	4.6575	-0.1575	8.1125	-0.6525	10.6625	-1.065
		1	-9.47	1.53	0.76	-0.21	4.15	-0.87	6.64	-1.42
			eps=4		eps=10		eps=20		water
			Fe-ox + 2e produto	Fe-red+ 1e product	Fe-ox + 2e produto	Fe-red+ 1e product	Fe-ox + 2e produto	Fe-red+ 1e product	Fe-ox + 2e produto	Fe-red+ 1e product
		-0.1	-34.0771	0.0195	-20.8269		-16.3165		-12.9045
		0	-37.12	0	-24	0	-19.54	0	-16.17	0
		0.2	-42.3364	0.078	-29.4396	-0.0108	-25.066	-0.2772	-21.768	-0.4932
		0.5	-47.9875	0.4875	-35.3325	-0.0225	-31.0525	-0.5775	-27.8325	-1.0275
		1	-51.61	1.95	-39.11	-0.03	-34.89	-0.77	-31.72	-1.37
			eps=4		eps=10		eps=20		water
			Fe-ox+ 1e	Fe-red+ start	Fe-ox+ 1e	Fe-red+ start	Fe-ox+ 1e	Fe-red+ start	Fe-ox+ 1e	Fe-red+ start
		0	-8.77	0	10.63	0	17.15	0	22.06	0
		0.2	-13.5544	0.212	5.7232	0.1512	12.2036	0.128	17.074	0.11
		0.5	-18.7375	1.325	0.4075	0.945	6.845	0.8	11.6725	0.6875
		1	-22.06	5.3	-3	3.78	3.41	3.2	8.21	2.75
